# Supplementary material
Source: Springer Nature journal article supplement (https://www.springermedizin.de/resource/supplementary/12888_2014_1536_MOESM1_ESM.pdf/9481288)

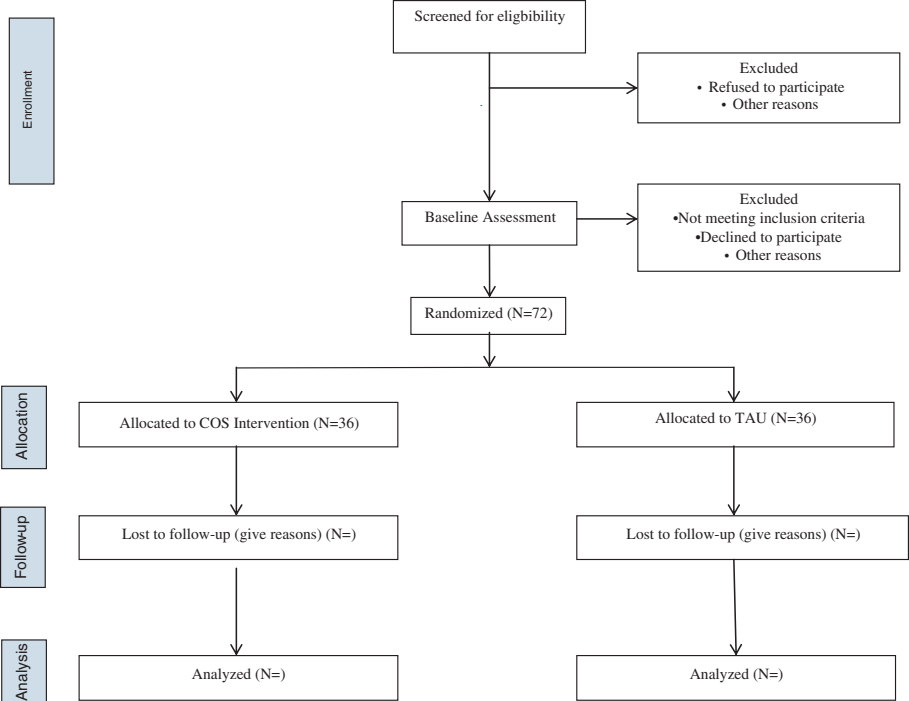

Supplement: MOESM1 [file 9481288]
